# Supplementary material for: Fabrication of Fe3O4@SiO2@Ag magnetic–plasmonic nanospindles as highly efficient SERS active substrates for label-free detection of pesticides
Source: Royal Society of Chemistry journal article supplement (doi:10.1039/c6nj03335k), 2016-12-24
Supplement: c6nj03335k1.pdf [file c6nj03335k1.pdf]

Electronic Supplementary Material (ESI) for New Journal of Chemistry.

This journal is © The Royal Society of Chemistry and the Centre National de la Recherche Scientifique 2016

## Supporting Information

### Fabrication of $\text{Fe}_3\text{O}_4@\text{SiO}_2@\text{Ag}$ magnetic-plasmonic nanospindles as highly efficient SERS active substrates for label-free detection of pesticides

Qinye He,<sup>a,b,c</sup> Aiwu Zhao,<sup>\*a,b,c</sup> Lei Li,<sup>a,b,c</sup> Henghui Sun,<sup>a,c</sup> Dapeng Wang,<sup>a,b,c</sup> Hongyan Guo,<sup>a,b,c</sup> Mei Sun,<sup>a,c</sup> Ping Chen<sup>a,c</sup>

<sup>a</sup> Institute of Intelligent Machines, Chinese Academy of Sciences, Hefei, 230031, P. R. China.

E-mail: awzhao@iim.ac.cn; Fax: +86-551-65592420; Tel: +86-551-65593360

<sup>b</sup> Department of Chemistry, University of Science and Technology of China, Hefei, 230026, Anhui, P. R. China

<sup>c</sup> State Key Laboratory of Transducer Technology, Chinese Academy of Sciences, Hefei, 230031, P. R. China

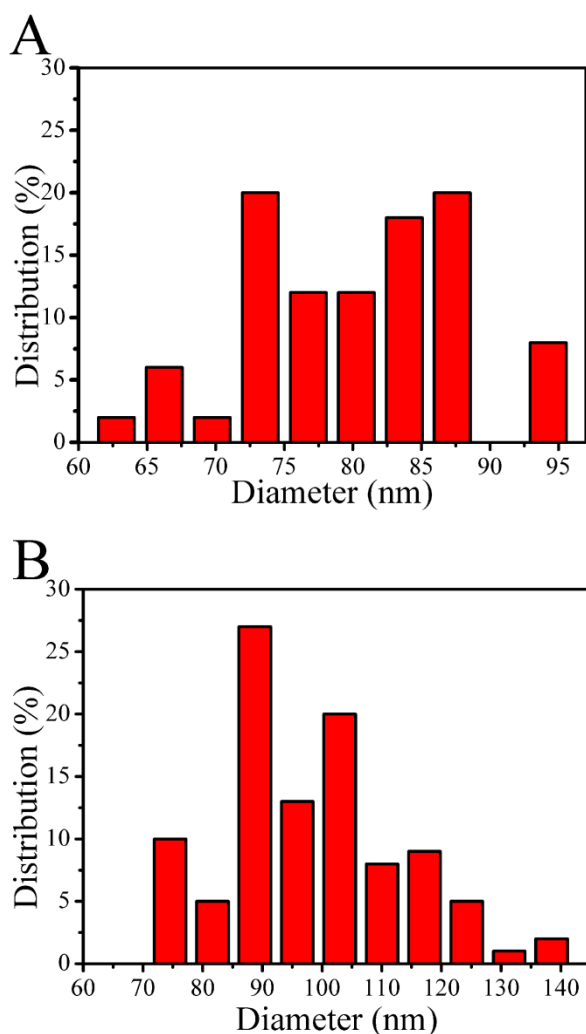

**Figure S1.** Lateral size distributions of the  $\beta\text{-FeOOH}$  (A) and the  $\beta\text{-FeOOH}@\text{SiO}_2$  nanospindles (B).

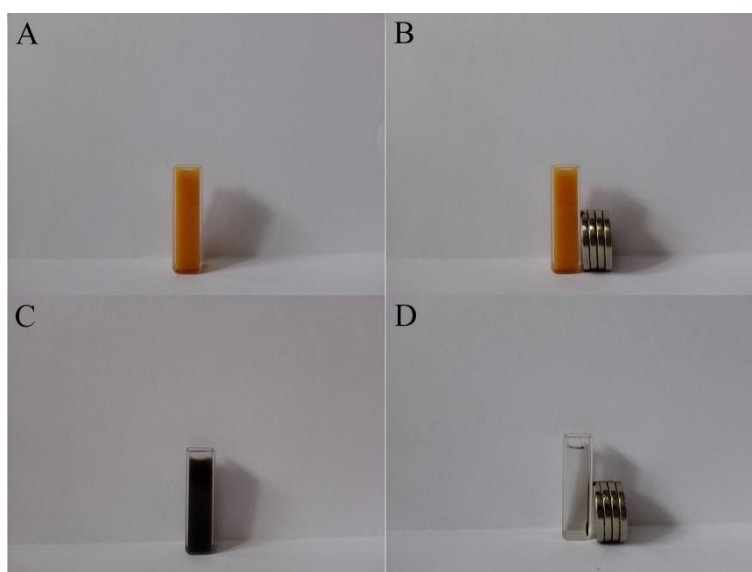

**Figure S2.** Optical images of the  $\beta$ -FeOOH@SiO<sub>2</sub> suspension solution (A-B) and the Fe<sub>3</sub>O<sub>4</sub>@SiO<sub>2</sub> suspension solution (C-D) without an external magnetic field and in an external magnetic field.

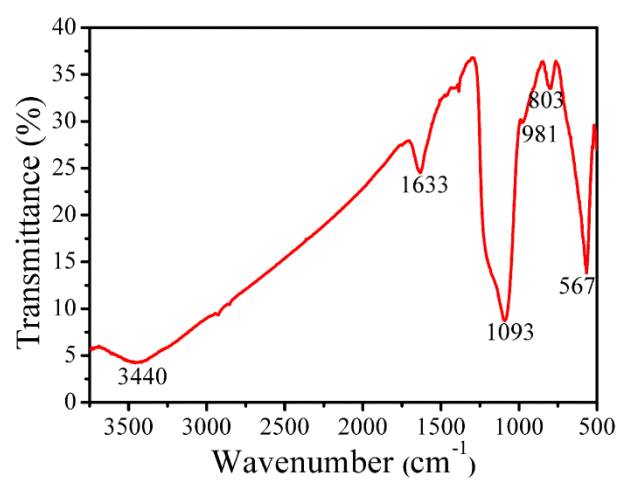

**Figure S3.** IR spectra of the Fe<sub>3</sub>O<sub>4</sub>@SiO<sub>2</sub> nanospindles.

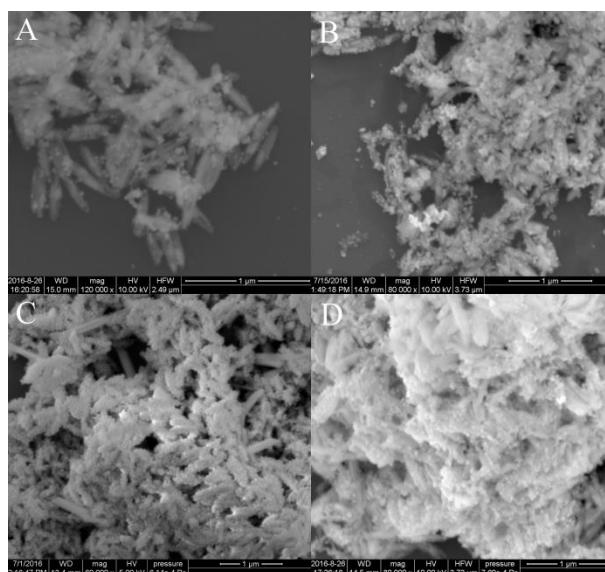

**Figure S4.** SEM images of the  $\text{Fe}_3\text{O}_4@\text{SiO}_2@\text{Ag}$  nanopindles fabricated at various concentrations of  $\text{AgNO}_3$  from (A)10mM, (B)20mM, (C)40mM to (D)80mM.

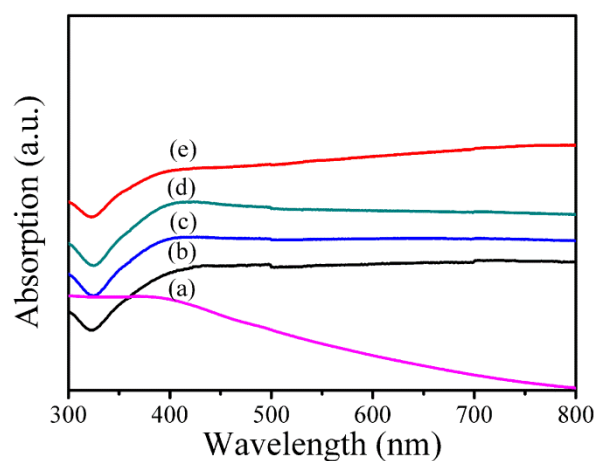

**Figure S5.** UV-vis spectra of (a)  $\text{Fe}_3\text{O}_4@\text{SiO}_2$  nanopindles and  $\text{Fe}_3\text{O}_4@\text{SiO}_2$  nanopindles prepared with following concentrations of  $\text{AgNO}_3$ : (b) 10 mM; (c) 20 mM; (d) 40 mM; (e) 80 mM.

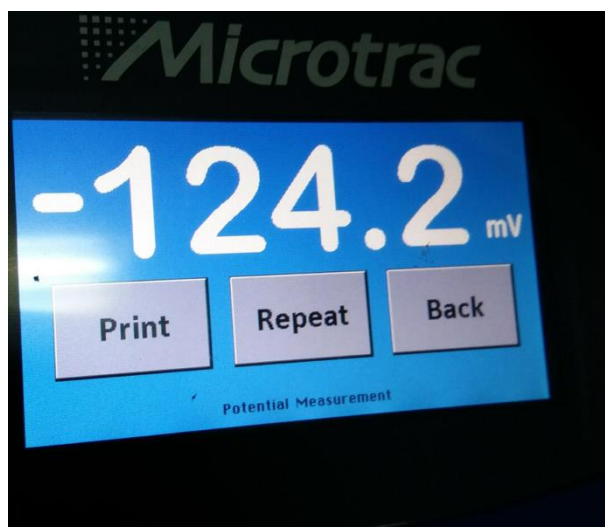

**Figure S6.** Optical images of the zeta potential of  $\text{Fe}_3\text{O}_4@\text{SiO}_2$  nanopindles in ultrapure water.
